# Supplementary material
Source: HighWire-hosted journal article supplement (http://molpharm.aspetjournals.org/highwire/filestream/76786/field_highwire_adjunct_files/1/Supplementary_Table_S1.pdf)
Supplement: Supplementary_Table_S1.pdf [file Supplementary_Table_S1.pdf]

## Identification of Survival Genes in Human Glioblastoma Cells Using siRNA Screening

Nikhil G Thaker, Fang Zhang, Peter R. McDonald, Tong Ying Shun, Michael D Lewen, Ian F. Pollack, and John S. Lazo

Molecular Pharmacology

Supplementary Table S1

Genes identified as reproducibly essential genes for glioma cell viability using the binning method

| <b>Gene Symbol</b> | <b>Full Gene Name</b>                                             | <b>Accession No</b> | <b># of Bins</b> | <b>Percent viability (%)</b> |
|--------------------|-------------------------------------------------------------------|---------------------|------------------|------------------------------|
| DDX39              | DEAD (Asp-Glu-Ala-Asp) box polypeptide 39                         | NM_138998           | 7                | 9.43                         |
| PSMD14             | proteasome (prosome, macropain) 26S subunit, non-ATPase, 14       | NM_005805           | 6                | 10.90                        |
| SPINK1             | serine protease inhibitor, Kazal type 1                           | NM_003122           | 5                | 11.19                        |
| RAN                | RAN, member RAS oncogene family                                   | NM_006325           | 8                | 11.81                        |
| PSMC6              | proteasome (prosome, macropain) 26S subunit, ATPase, 6            | NM_002806           | 6                | 12.17                        |
| TLR2               | toll-like receptor 2                                              | NM_003264           | 5                | 12.30                        |
| K-ALPHA-1          | K-ALPHA-1                                                         | NM_006082           | 7                | 12.63                        |
| BUB1B              | BUB1 budding uninhibited by benzimidazoles 1 homolog beta (yeast) | NM_001211           | 5                | 13.49                        |
| PSMB4              | proteasome (prosome, macropain) subunit, beta type, 4             | NM_002796           | 5                | 13.93                        |
| GRHPR              | glyoxylate reductase/hydroxypyruvate reductase                    | NM_012203           | 6                | 14.21                        |
| PSMC3              | proteasome (prosome, macropain) 26S subunit, ATPase, 3            | NM_002804           | 7                | 15.28                        |
| PRKCD              | protein kinase C, delta                                           | NM_006254           | 5                | 15.55                        |
| POLR2F             | polymerase (RNA) II (DNA directed) polypeptide F                  | NM_021974           | 7                | 16.11                        |

## Identification of Survival Genes in Human Glioblastoma Cells Using siRNA Screening

Nikhil G Thaker, Fang Zhang, Peter R. McDonald, Tong Ying Shun, Michael D Lewen, Ian F. Pollack, and John S. Lazo

### Molecular Pharmacology

|           |                                                                                                  |           |   |       |
|-----------|--------------------------------------------------------------------------------------------------|-----------|---|-------|
| AKT3      | v-akt murine thymoma viral oncogene homolog 3 (protein kinase B, gamma)                          | NM_181690 | 5 | 16.28 |
| PSMC5     | proteasome (prosome, macropain) 26S subunit, ATPase, 5                                           | NM_002805 | 5 | 17.08 |
| PSMA1     | proteasome (prosome, macropain) subunit, alpha type, 1                                           | NM_148976 | 5 | 17.32 |
| SPTLC1    | serine palmitoyltransferase, long chain base subunit 1                                           | NM_178324 | 7 | 17.67 |
| CGI-04    | tyrosyl-tRNA synthetase 2 (mitochondrial)                                                        | NM_015936 | 5 | 18.42 |
| HLCS      | holocarboxylase synthetase (biotin-[proprionyl-Coenzyme A-carboxylase (ATP-hydrolysing)] ligase) | NM_000411 | 6 | 18.63 |
| TNFRSF10B | tumor necrosis factor receptor superfamily, member 10b                                           | NM_147187 | 5 | 18.84 |
| MPHOSPH1  | M-phase phosphoprotein 1                                                                         | NM_016195 | 5 | 18.84 |
| SIAT4B    | ST3 beta-galactoside alpha-2,3-sialyltransferase 2                                               | NM_006927 | 7 | 18.85 |
| PSMB2     | proteasome (prosome, macropain) subunit, beta type, 2                                            | NM_002794 | 6 | 18.88 |
| DPYSL4    | dihydropyrimidinase-like 4                                                                       | NM_006426 | 5 | 19.00 |
| UBL5      | ubiquitin-like 5                                                                                 | NM_024292 | 5 | 19.09 |
| AGA       | aspartylglucosaminidase                                                                          | NM_000027 | 5 | 19.42 |
| GRCC9     | GRCC9                                                                                            | NM_032641 | 5 | 19.50 |
| TUBGCP6   | tubulin, gamma complex associated protein 6                                                      | NM_020461 | 7 | 19.83 |

## Identification of Survival Genes in Human Glioblastoma Cells Using siRNA Screening

Nikhil G Thaker, Fang Zhang, Peter R. McDonald, Tong Ying Shun, Michael D Lewen, Ian F. Pollack, and John S. Lazo

### Molecular Pharmacology

|        |                                                                                                              |              |   |       |
|--------|--------------------------------------------------------------------------------------------------------------|--------------|---|-------|
| PKD1L3 | polycystic kidney disease 1-like 3                                                                           | NM_181536    | 5 | 19.90 |
| GRIN1  | glutamate receptor, ionotropic, N-methyl D-aspartate 1                                                       | NM_007327    | 6 | 20.01 |
| SIAT7E | ST6 (alpha-N-acetylneuraminyl-2,3-beta-galactosyl-1,3)-N-acetylgalactosaminide alpha-2,6-sialyltransferase 5 | NM_030965    | 7 | 20.03 |
| TNNI3K | TNNI3 interacting kinase                                                                                     | NM_015978    | 5 | 20.08 |
| ZAP128 | ZAP128                                                                                                       | NM_006821    | 6 | 20.51 |
| GPX2   | glutathione peroxidase 2 (gastrointestinal)                                                                  | NM_002083    | 5 | 20.65 |
| BTN2A3 | butyrophilin, subfamily 2, member A3                                                                         | NM_024018    | 7 | 21.10 |
| POLR2A | polymerase (RNA) II (DNA directed) polypeptide A, 220kDa                                                     | NM_000937    | 5 | 21.33 |
| CLCN3  | chloride channel 3                                                                                           | NM_173872    | 7 | 22.20 |
| PSMA4  | proteasome (prosome, macropain) subunit, alpha type, 4                                                       | NM_002789    | 5 | 22.20 |
| CHN1   | chimerin (chimaerin) 1                                                                                       | NM_001025201 | 6 | 22.38 |
| POLR2G | polymerase (RNA) II (DNA directed) polypeptide G                                                             | NM_002696    | 5 | 22.72 |
| PSMA6  | proteasome (prosome, macropain) subunit, alpha type, 6                                                       | NM_002791    | 6 | 23.10 |
| RAB40B | RAB40B, member RAS oncogene family                                                                           | NM_006822    | 5 | 23.11 |
| SLC7A2 | solute carrier family 7 (cationic amino acid transporter, y+ system), member 2                               | NM_003046    | 7 | 23.17 |
| PSMA3  | proteasome (prosome, macropain) subunit, alpha type, 3                                                       | NM_152132    | 6 | 23.57 |

## Identification of Survival Genes in Human Glioblastoma Cells Using siRNA Screening

Nikhil G Thaker, Fang Zhang, Peter R. McDonald, Tong Ying Shun, Michael D Lewen, Ian F. Pollack, and John S. Lazo

### Molecular Pharmacology

|          |                                                                                                 |           |   |       |
|----------|-------------------------------------------------------------------------------------------------|-----------|---|-------|
| GUSB     | glucuronidase, beta                                                                             | NM_000181 | 7 | 25.25 |
| ARHGEF11 | Rho guanine nucleotide exchange factor (GEF) 11                                                 | NM_014784 | 5 | 25.43 |
| PIGQ     | phosphatidylinositol glycan, class Q                                                            | NM_148920 | 6 | 26.07 |
| PSMA5    | proteasome (prosome, macropain) subunit, alpha type, 5                                          | NM_002790 | 6 | 26.64 |
| IDH3B    | isocitrate dehydrogenase 3 (NAD+) beta                                                          | NM_174856 | 7 | 26.89 |
| COX7A2   | cytochrome c oxidase subunit VIIa polypeptide 2 (liver)                                         | NM_001865 | 5 | 26.94 |
| POMT1    | protein-O-mannosyltransferase 1                                                                 | NM_007171 | 6 | 27.85 |
| RRM1     | ribonucleotide reductase M1 polypeptide                                                         | NM_001033 | 7 | 28.41 |
| PSMA2    | proteasome (prosome, macropain) subunit, alpha type, 2                                          | NM_002787 | 6 | 28.91 |
| SMS      | spermine synthase                                                                               | NM_004595 | 6 | 29.64 |
| ITGB3    | integrin, beta 3 (platelet glycoprotein IIIa, antigen CD61)                                     | NM_000212 | 5 | 29.77 |
| BST1     | bone marrow stromal cell antigen 1                                                              | NM_004334 | 5 | 31.12 |
| CYP1B1   | cytochrome P450, family 1, subfamily B, polypeptide 1                                           | NM_000104 | 5 | 31.42 |
| GALNS    | galactosamine (N-acetyl)-6-sulfate sulfatase (Morquio syndrome, mucopolysaccharidosis type IVA) | NM_000512 | 5 | 32.58 |
